# Supplementary material for: Genetic Architecture of Skewed X Inactivation in the Laboratory Mouse
Source: PLoS Genet. 2013 Oct 3;9(10):e1003853. doi: 10.1371/journal.pgen.1003853 (PMC3789830; doi:10.1371/journal.pgen.1003853)
Supplement: Table S8 — Pyrosequencing expression assay allele information. The table shows the mouse strains phenotyped and their genotype for each pyrosequencing assay used. Strains without genotype information are labeled “N/D.” (XLSX) [file pgen.1003853.s012.xlsx]

## Sheet: Sheet1
	Ddx26b	Fgd1	Rragb1	Zfp185	Mid2	Xist
A/J	C	A	A	T	T	G
129S1/SvlmJ	T	A	A	A	T	G
C57BL/6J	T	A	A	A	C	G
CAST/EiJ	C	A	G	A	C	A
PWK/PhJ	C	A	G	A	C	A
WSB/EiJ	C	A	G	A	C	G
LEWES/EiJ	C	A	G	N/D	N/D	N/D
WLA/Pas	C	A	G	N/D	N/D	N/D
ALS/LtJ	T	G	G	N/D	T	G
SJL/J	T	G	A	T	N/D	N/D
TIRANO/EiJ	C	N/D	G	N/D	C	G
ZALENDE/EiJ	C	N/D	G	N/D	C	G
PERA/EiJ	C	N/D	G	N/D	C	G
PANCEVO/EiJ	C	N/D	G	N/D	C	A
DDK/Pas	T	N/D	G	N/D	C	G
